# Supplementary material for: Antimicrobial Resistance Profiles, Virulence Determinants, and Biofilm Formation in Enterococci Isolated from Rhesus Macaques (Macaca mulatta): A Potential Threat for Wildlife in Bangladesh?
Source: MDPI journal article supplement (doi:10.3390/ani13142268), 2023-07-11
Supplement: s1 [file s1]

## Supplementary Materials

# Antimicrobial Resistance Profiles, Virulence Determinants, and Biofilm Formation in Enterococci Isolated from Rhesus Macaques (*Macaca mulatta*): A Potential Threat for Wildlife in Bangladesh?

Farhana Binte Ferdous <sup>1</sup>, Md. Saiful Islam <sup>1</sup>, Md. Ashek Ullah <sup>1</sup>, Md. Liton Rana <sup>1</sup>, Sadia Afrin Punom <sup>1</sup>, Fahim Haque Nelay <sup>1</sup>, Mohammad Nizam Uddin Chowdhury <sup>2</sup>, Jayedul Hassan <sup>1</sup>, Mahbubul Pratik Siddique <sup>1</sup>, Sukumar Saha <sup>1</sup> and Md. Tanvir Rahman <sup>1,\*</sup>

<sup>1</sup> Department of Microbiology and Hygiene, Faculty of Veterinary Science, Bangladesh Agricultural University, Mymensingh 2202, Bangladesh; farhanaferdous1501184@gmail.com (F.B.F.); dvm41257@bau.edu.bd (M.S.I.); ashek.21110216@bau.edu.bd (M.A.U.); liton.21110215@bau.edu.bd (M.L.R.); punom.vmh@bau.edu.bd (S.A.P.); neloymb002@gmail.com (F.H.N.); dr\_jahid@bau.edu.bd (J.H.); mpsiddique@bau.edu.bd (M.P.S.); sukumar.saha@bau.edu.bd (S.S.)

<sup>2</sup> Sheikh Kamal Wildlife Center, Bangladesh Forest Department, Gazipur 1706, Bangladesh; nizamvet05@gmail.com

\* Correspondence: tanvirahman@bau.edu.bd

## Supplementary Materials

**Supplementary Table S1.** Pearson correlation coefficient to assess the pairs of any of two virulence genes detected in *E. faecalis* isolated from rectal swab of samples of rhesus macaques.

|             |                     | <i>agg</i> | <i>fsrA</i> | <i>fsrB</i> | <i>fsrC</i> | <i>pil</i> | <i>gelE</i> | <i>sprE</i> | <i>ace</i> | <i>cyl</i> |
|-------------|---------------------|------------|-------------|-------------|-------------|------------|-------------|-------------|------------|------------|
| <i>agg</i>  | Pearson Correlation | 1          |             |             |             |            |             |             |            |            |
|             | Sig. (2-tailed)     |            |             |             |             |            |             |             |            |            |
| <i>fsrA</i> | Pearson Correlation | 0.142      | 1           |             |             |            |             |             |            |            |
|             | Sig. (2-tailed)     | 0.358      |             |             |             |            |             |             |            |            |
| <i>fsrB</i> | Pearson Correlation | -0.069     | 0.017       | 1           |             |            |             |             |            |            |
|             | Sig. (2-tailed)     | 0.656      | 0.912       |             |             |            |             |             |            |            |
| <i>fsrC</i> | Pearson Correlation | -0.048     | -0.118      | -0.069      | 1           |            |             |             |            |            |
|             | Sig. (2-tailed)     | 0.759      | 0.444       | 0.656       |             |            |             |             |            |            |
| <i>pil</i>  | Pearson Correlation | -0.048     | 0.402**     | -0.069      | -0.048      | 1          |             |             |            |            |
|             | Sig. (2-tailed)     | 0.759      | 0.007       | 0.656       | 0.759       |            |             |             |            |            |
| <i>gelE</i> | Pearson Correlation | -0.059     | 0.068       | -0.086      | -0.059      | -0.059     | 1           |             |            |            |
|             | Sig. (2-tailed)     | 0.703      | 0.659       | 0.581       | 0.703       | 0.703      |             |             |            |            |
| <i>sprE</i> | Pearson Correlation | -0.033     | 0.281       | 0.482**     | -0.033      | -0.033     | -0.041      | 1           |            |            |
|             | Sig. (2-tailed)     | 0.83       | 0.064       | 0.001       | 0.83        | 0.83       | 0.79        |             |            |            |
| <i>ace</i>  | Pearson Correlation | 0.142      | 0.871**     | 0.017       | -0.118      | 0.402**    | -0.147      | 0.281       | 1          |            |
|             | Sig. (2-tailed)     | 0.358      | 0           | 0.912       | 0.444       | 0.007      | 0.342       | 0.064       |            | .          |
| <i>cyl</i>  | Pearson Correlation | .a         | .a          | .a          | .a          | .a         | .a          | .a          | .a         | .a         |
|             | Sig. (2-tailed)     | .          | .           | .           | .           | .          | .           | .           | .          | .          |

\*\*Correlation is significant at the 0.01 level (2-tailed), .aCan-t be computed because at least one of the variables is constant.

**Supplementary Table S2.** Association in the detection of virulence genes and determination of biofilm formation in *E. faecalis* (n = 44) isolated from rectal swab samples of rhesus macaques.

| Virulence genes | Virulence in different degrees of biofilm formation |                                              |                                    | p-value |
|-----------------|-----------------------------------------------------|----------------------------------------------|------------------------------------|---------|
|                 | No. (%) strong biofilm former (n = 9)               | No. (%) intermediate biofilm former (n = 26) | No. (%) non-biofilm former (n = 9) |         |
| <i>agg</i>      | 9 (100 <sup>a,b</sup> )                             | 26 (100 <sup>b</sup> )                       | 7 (77.8 <sup>a</sup> )             | 0.017   |
| <i>fsrA</i>     | 9 (100 <sup>a</sup> )                               | 26 (100 <sup>a</sup> )                       | 0 (0 <sup>b</sup> )                | <0.001  |
| <i>fsrB</i>     | 9 (100 <sup>a</sup> )                               | 23 (88.5 <sup>a</sup> )                      | 9 (100 <sup>a</sup> )              | 0.328   |
| <i>fsrC</i>     | 9 (100 <sup>a</sup> )                               | 25 (96.2 <sup>a</sup> )                      | 9 (100 <sup>a</sup> )              | 0.702   |
| <i>pil</i>      | 9 (100 <sup>a,b</sup> )                             | 26 (100 <sup>b</sup> )                       | 7 (77.8 <sup>a</sup> )             | 0.017   |
| <i>gelE</i>     | 9 (100 <sup>a</sup> )                               | 23 (88.5 <sup>a</sup> )                      | 9 (100 <sup>a</sup> )              | 0.328   |
| <i>sprE</i>     | 9 (100 <sup>a</sup> )                               | 26 (100 <sup>a</sup> )                       | 8 (88.9 <sup>a</sup> )             | 0.137   |
| <i>ace</i>      | 9 (100 <sup>a</sup> )                               | 26 (100 <sup>a</sup> )                       | 0 (0 <sup>b</sup> )                | <0.001  |
| <i>cyl</i>      | 0 (0 <sup>a</sup> )                                 | 0 (0 <sup>a</sup> )                          | 0 (0 <sup>a</sup> )                | NA      |

Here, values with different superscripts differ significantly ( $P < 0.05$ ) within the variable under assessment, CI= Confidence interval, NA= Not applied.

**Supplementary Table S3.** Association of antibiotic resistance patterns and biofilm formation in *E. faecalis* strains detected in rectal swab samples of rhesus macaques.

| Categories | Antibiotics               | Antibiotic resistance in different degrees of biofilm formation |                                              |                                    | p-value |
|------------|---------------------------|-----------------------------------------------------------------|----------------------------------------------|------------------------------------|---------|
|            |                           | No. (%) strong biofilm former (n = 9)                           | No. (%) intermediate biofilm former (n = 26) | No. (%) non-biofilm former (n = 9) |         |
| Phenotypic | CIP                       | 0 (0 <sup>a</sup> )                                             | 0 (0 <sup>a</sup> )                          | 0 (0 <sup>a</sup> )                | NA      |
|            | TE                        | 2 (22.2 <sup>a</sup> )                                          | 6 (23.1 <sup>a</sup> )                       | 1 (11.1 <sup>a</sup> )             | 0.737   |
|            | LEV                       | 0 (0 <sup>a</sup> )                                             | 0 (0 <sup>a</sup> )                          | 0 (0 <sup>a</sup> )                | NA      |
|            | FOS                       | 0 (0 <sup>a</sup> )                                             | 0 (0 <sup>a</sup> )                          | 0 (0 <sup>a</sup> )                | NA      |
|            | RD                        | 9 (100 <sup>a</sup> )                                           | 26 (100 <sup>a</sup> )                       | 9 (100 <sup>a</sup> )              | NA      |
|            | P                         | 9 (100 <sup>a</sup> )                                           | 26 (100 <sup>a</sup> )                       | 9 (100 <sup>a</sup> )              | NA      |
|            | LZD                       | 9 (100 <sup>a</sup> )                                           | 16 (61.5 <sup>a</sup> )                      | 1 (11.1 <sup>b</sup> )             | 0.001   |
|            | NOR                       | 0 (0 <sup>a</sup> )                                             | 0 (0 <sup>a</sup> )                          | 0 (0 <sup>a</sup> )                | NA      |
|            | NIT                       | 0 (0 <sup>a</sup> )                                             | 0 (0 <sup>a</sup> )                          | 0 (0 <sup>a</sup> )                | NA      |
|            | AMP                       | 9 (100 <sup>a</sup> )                                           | 26 (100 <sup>a</sup> )                       | 9 (100 <sup>a</sup> )              | NA      |
|            | C                         | 2 (22.2 <sup>a</sup> )                                          | 1 (3.8 <sup>a</sup> )                        | 0 (0 <sup>a</sup> )                | 0.112   |
|            | VA                        | 9 (100 <sup>a</sup> )                                           | 13 (50 <sup>b</sup> )                        | 1 (11.1 <sup>b</sup> )             | 0.001   |
|            | E                         | 9 (100 <sup>a</sup> )                                           | 15 (57.7 <sup>a,b</sup> )                    | 2 (22.2 <sup>b</sup> )             | 0.003   |
| Genotypic  | <i>bla</i> <sub>TEM</sub> | 9 (100 <sup>a</sup> )                                           | 12 (46.2 <sup>b</sup> )                      | 6 (66.7 <sup>a,b</sup> )           | 0.016   |

Here, values with different superscripts differ significantly ( $P < 0.05$ ) within the variable under assessment, CI= Confidence interval, NA= Not applied.

**Supplementary Table S4:** Pearson correlation coefficient to assess the pairs of any of two virulence genes detected in *E. faecium* isolated from rectal swab samples of rhesus macaques

| Correlations |                     |            |             |             |             |            |             |             |            |            |
|--------------|---------------------|------------|-------------|-------------|-------------|------------|-------------|-------------|------------|------------|
|              |                     | <i>agg</i> | <i>fsrA</i> | <i>fsrB</i> | <i>fsrC</i> | <i>pil</i> | <i>gelE</i> | <i>sprE</i> | <i>ace</i> | <i>cyl</i> |
| <i>agg</i>   | Pearson Correlation | 1          |             |             |             |            |             |             |            |            |
|              | Sig. (2-tailed)     |            |             |             |             |            |             |             |            |            |
| <i>fsrA</i>  | Pearson Correlation | 0.48       | 1           |             |             |            |             |             |            |            |
|              | Sig. (2-tailed)     | 0.07       |             |             |             |            |             |             |            |            |
| <i>fsrB</i>  | Pearson Correlation | 0.48       | 0.722**     | 1           |             |            |             |             |            |            |
|              | Sig. (2-tailed)     | 0.07       | 0.002       |             |             |            |             |             |            |            |
| <i>fsrC</i>  | Pearson Correlation | 0.48       | 0.722**     | 0.722**     | 1           |            |             |             |            |            |
|              | Sig. (2-tailed)     | 0.07       | 0.002       | 0.002       |             |            |             |             |            |            |
| <i>pil</i>   | Pearson Correlation | 0.207      | -0.185      | -0.185      | -0.185      | 1          |             |             |            |            |
|              | Sig. (2-tailed)     | 0.459      | 0.51        | 0.51        | 0.51        |            |             |             |            |            |
| <i>gelE</i>  | Pearson Correlation | 0.48       | 0.722**     | 0.722**     | 0.722**     | -0.185     | 1           |             |            |            |
|              | Sig. (2-tailed)     | 0.07       | 0.002       | 0.002       | 0.002       | 0.51       |             |             |            |            |
| <i>sprE</i>  | Pearson Correlation | 0.48       | 0.444       | 0.444       | 0.444       | 0.431      | 0.444       | 1           |            |            |
|              | Sig. (2-tailed)     | 0.07       | 0.097       | 0.097       | 0.097       | 0.109      | 0.097       |             |            |            |
| <i>ace</i>   | Pearson Correlation | 0.650**    | 0.739**     | 0.739**     | 0.739**     | -0.023     | 0.739**     | 0.739**     | 1          |            |
|              | Sig. (2-tailed)     | 0.009      | 0.002       | 0.002       | 0.002       | 0.936      | 0.002       | 0.002       |            |            |
| <i>cyl</i>   | Pearson Correlation | 0.423      | 0.48        | 0.48        | 0.48        | -0.237     | 0.48        | 0.48        | 0.650**    | 1          |
|              | Sig. (2-tailed)     | 0.116      | 0.07        | 0.07        | 0.07        | 0.396      | 0.07        | 0.07        | 0.009      |            |

\*\*Correlation is significant at the 0.01 level (2-tailed).

**Supplementary Table S05.** Association in the detection of virulence genes and determination of biofilm formation in *E. faecium* (n = 15) isolated from rectal swab samples of rhesus macaques.

| Virulence genes | Virulence in different degrees of biofilm formation |                                             |                                    | p-value |
|-----------------|-----------------------------------------------------|---------------------------------------------|------------------------------------|---------|
|                 | No. (%) strong biofilm former (n = 3)               | No. (%) intermediate biofilm former (n = 9) | No. (%) non-biofilm former (n = 3) |         |
| <i>agg</i>      | 2 (66.7 <sup>a</sup> )                              | 0 (0 <sup>b</sup> )                         | 0 (0 <sup>a,b</sup> )              | 0.010   |
| <i>fsrA</i>     | 3 (100 <sup>a</sup> )                               | 3 (33.3 <sup>a,b</sup> )                    | 0 (0 <sup>b</sup> )                | 0.036   |
| <i>fsrB</i>     | 3 (100 <sup>a</sup> )                               | 3 (33.3 <sup>a,b</sup> )                    | 0 (0 <sup>b</sup> )                | 0.036   |
| <i>fsrC</i>     | 3 (100 <sup>a</sup> )                               | 3 (33.3 <sup>a,b</sup> )                    | 0 (0 <sup>b</sup> )                | 0.036   |
| <i>pil</i>      | 1 (33.3 <sup>a</sup> )                              | 3 (33.3 <sup>a</sup> )                      | 0 (0 <sup>a</sup> )                | 0.506   |
| <i>gelE</i>     | 3 (100 <sup>a</sup> )                               | 3 (33.3 <sup>a,b</sup> )                    | 0 (0 <sup>b</sup> )                | 0.036   |
| <i>sprE</i>     | 3 (100 <sup>a</sup> )                               | 3 (33.3 <sup>a,b</sup> )                    | 0 (0 <sup>b</sup> )                | 0.036   |
| <i>ace</i>      | 3 (100 <sup>a</sup> )                               | 1 (11.1 <sup>b</sup> )                      | 0 (0 <sup>b</sup> )                | 0.005   |
| <i>cyl</i>      | 0 (0 <sup>a</sup> )                                 | 0 (0 <sup>a</sup> )                         | 0 (0 <sup>a</sup> )                | NA      |

Here, values with different superscripts differ significantly ( $P < 0.05$ ) within the variable under assessment, CI= Confidence interval, NA= Not applied.

**Supplementary Table S6.** Association of antibiotic resistance patterns and biofilm formation in *E. faecium* strains detected in rectal swab samples of rhesus macaques.

| Categories | Antibiotics               | Antibiotic resistance in different degrees of biofilm formation |                                             |                                    | <i>p</i> -value |
|------------|---------------------------|-----------------------------------------------------------------|---------------------------------------------|------------------------------------|-----------------|
|            |                           | No. (%) strong biofilm former (n = 3)                           | No. (%) intermediate biofilm former (n = 9) | No. (%) non-biofilm former (n = 3) |                 |
| Phenotypic | CIP                       | 0 (0 <sup>a</sup> )                                             | 0 (0 <sup>a</sup> )                         | 0 (0 <sup>a</sup> )                | NA              |
|            | TE                        | 0 (0 <sup>a</sup> )                                             | 0 (0 <sup>a</sup> )                         | 0 (0 <sup>a</sup> )                | NA              |
|            | LEV                       | 0 (0 <sup>a</sup> )                                             | 0 (0 <sup>a</sup> )                         | 0 (0 <sup>a</sup> )                | NA              |
|            | FOS                       | 0 (0 <sup>a</sup> )                                             | 0 (0 <sup>a</sup> )                         | 0 (0 <sup>a</sup> )                | NA              |
|            | RD                        | 3 (100 <sup>a</sup> )                                           | 9 (100 <sup>a</sup> )                       | 3 (100 <sup>a</sup> )              | NA              |
|            | P                         | 3 (100 <sup>a</sup> )                                           | 9 (100 <sup>a</sup> )                       | 3 (100 <sup>a</sup> )              | NA              |
|            | LZD                       | 3 (100 <sup>a</sup> )                                           | 6 (66.7 <sup>a,b</sup> )                    | 0 (0 <sup>b</sup> )                | 0.036           |
|            | NOR                       | 0 (0 <sup>a</sup> )                                             | 0 (0 <sup>a</sup> )                         | 0 (0 <sup>a</sup> )                | NA              |
|            | NIT                       | 0 (0 <sup>a</sup> )                                             | 0 (0 <sup>a</sup> )                         | 0 (0 <sup>a</sup> )                | NA              |
|            | AMP                       | 3 (100 <sup>a</sup> )                                           | 9 (100 <sup>a</sup> )                       | 3 (100 <sup>a</sup> )              | NA              |
|            | C                         | 0 (0 <sup>a</sup> )                                             | 0 (0 <sup>a</sup> )                         | 0 (0 <sup>a</sup> )                | NA              |
|            | VA                        | 3 (100 <sup>a</sup> )                                           | 4 (44.4 <sup>a,b</sup> )                    | 0 (0 <sup>b</sup> )                | 0.048           |
|            | E                         | 3 (100 <sup>a</sup> )                                           | 9 (100 <sup>a</sup> )                       | 3 (100 <sup>a</sup> )              | NA              |
| Genotypic  | <i>bla</i> <sub>TEM</sub> | 3 (100 <sup>a</sup> )                                           | 6 (66.7 <sup>a,b</sup> )                    | 0 (0 <sup>b</sup> )                | 0.036           |

Here, values with different superscripts differ significantly ( $P < 0.05$ ) within the variable under assessment, CI = Confidence interval, NA= Not applied.
